# Supplementary material for: Mitochondrial Reactive Oxygen Species Mediate Cardiac Structural, Functional, and Mitochondrial Consequences of Diet‐Induced Metabolic Heart Disease
Source: PubMed Central journal article supplement — J Am Heart Assoc. 2016 Jan 11;5(1):e002555. doi: 10.1161/JAHA.115.002555 (PMC4859372; doi:10.1161/jaha.115.002555), 2016-01-11

## Supplemental Material

**Table S1. Composition of HFHS and control diets.** D09071702 is HFHS diet and D09071703 is control diet.

|                     | D09071702 |       | D09071703 |       |
|---------------------|-----------|-------|-----------|-------|
| Product #           |           |       |           |       |
|                     | gm%       | kcal% | gm%       | kcal% |
| Protein             | 20.5      | 15    | 15.0      | 15    |
| Carbohydrate        | 38.2      | 28    | 76.3      | 75    |
| Fat                 | 35.5      | 58    | 4.5       | 10    |
| Total               |           | 100.0 |           | 100.0 |
| kcal/gm             | 5.54      |       | 4.05      |       |
|                     |           |       |           |       |
| Ingredient          | gm        | kcal  | gm        | kcal  |
| Casein              | 182       | 728   | 182       | 728   |
| DL-Methionine       | 3         | 12    | 3         | 12    |
|                     |           |       |           |       |
| Maltodextrin 10     | 170       | 680   | 170       | 680   |
| Corn starch         | 0         | 0     | 760       | 3040  |
| Sucrose             | 164       | 656   | 0         | 0     |
|                     |           |       |           |       |
| Lard                | 320       | 2880  | 55        | 495   |
|                     |           |       |           |       |
| Salt Mix, S10026B   | 50        | 0     | 50        | 0     |
|                     |           |       |           |       |
| Vitamin Mix, V10001 | 10        | 40    | 10        | 40    |
| Choline Bitartrate  | 2         | 0     | 2         | 0     |
|                     |           |       |           |       |
| Total               | 901       | 4996  | 1232.0    | 4995  |

**Table S2. Expression of informative subunits from each of the 5 electron transport chain complexes as measured by immunoblot.**

|                              | <b>WT / CD</b> | <b>WT / HFHS</b> | <b>mCAT / CD</b> | <b>mCAT / HFHS</b> |
|------------------------------|----------------|------------------|------------------|--------------------|
| <i>Protein (ETC complex)</i> |                |                  |                  |                    |
| NDUFB8 (Complex I)           | 1.00 ± 0.03    | 0.90 ± 0.04      | 1.0 ± 0.09       | 0.82 ± 0.07        |
| SDHB (Complex II)            | 1.00 ± 0.05    | 0.84 ± 0.04      | 0.79 ± 0.05      | 0.83 ± 0.09        |
| UQCRC2 (Complex III)         | 1.00 ± 0.14    | 0.95 ± 0.07      | 1.10 ± 0.05      | 1.00 ± 0.09        |
| MTCO1 (Complex IV)           | 1.00 ± 0.09    | 0.90 ± 0.07      | 0.84 ± 0.07      | 0.91 ± 0.18        |
| ATP5A (Complex V)            | 1.00 ± 0.07    | 0.94 ± 0.04      | 0.90 ± 0.03      | 0.84 ± 0.09        |

Values are normalized to VDAC and reported relative to WT / CD. Values are mean ± SEM. For all subunits, P = NS for WT / HFHS vs WT / CD and for mCAT / HFHS vs mCAT / CD.

**Figure S1. Both WT and mCAT mice on HFHS diet exhibit the same degree of total body weight gain. (n=4-5 per group).**

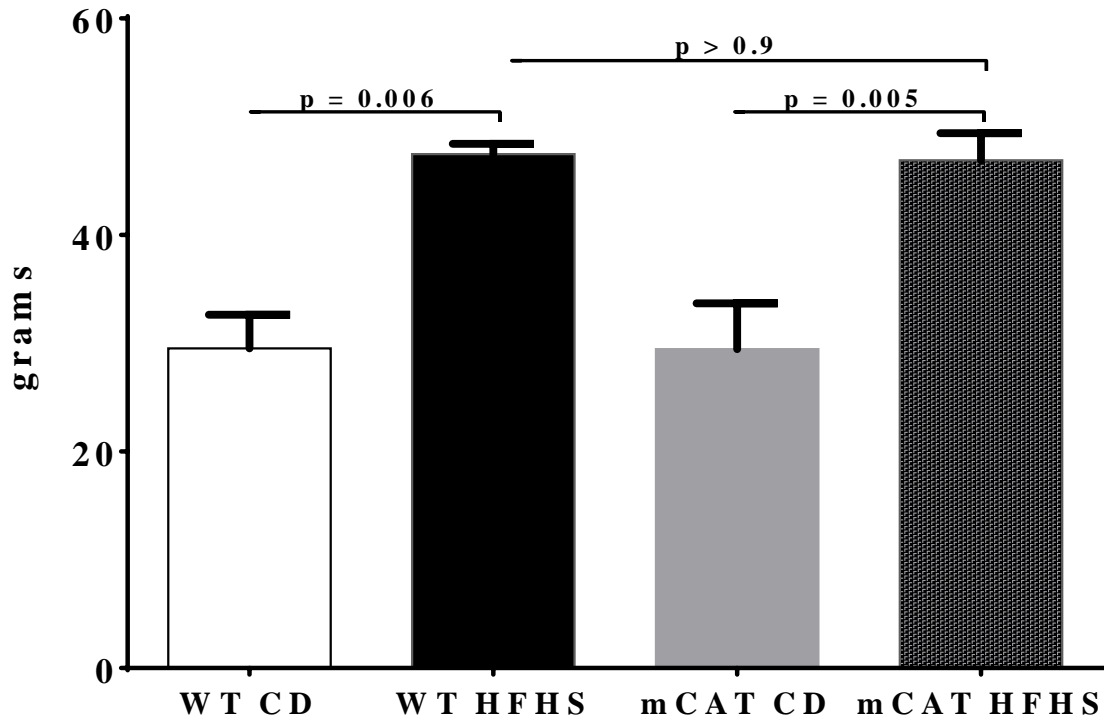

**Figure S2. Respiratory control ratios (RCR) obtained during oxygen consumption measurements.** HFHS diet had no effect on RCR values (obtained by dividing State III by State IV oxygen consumption).

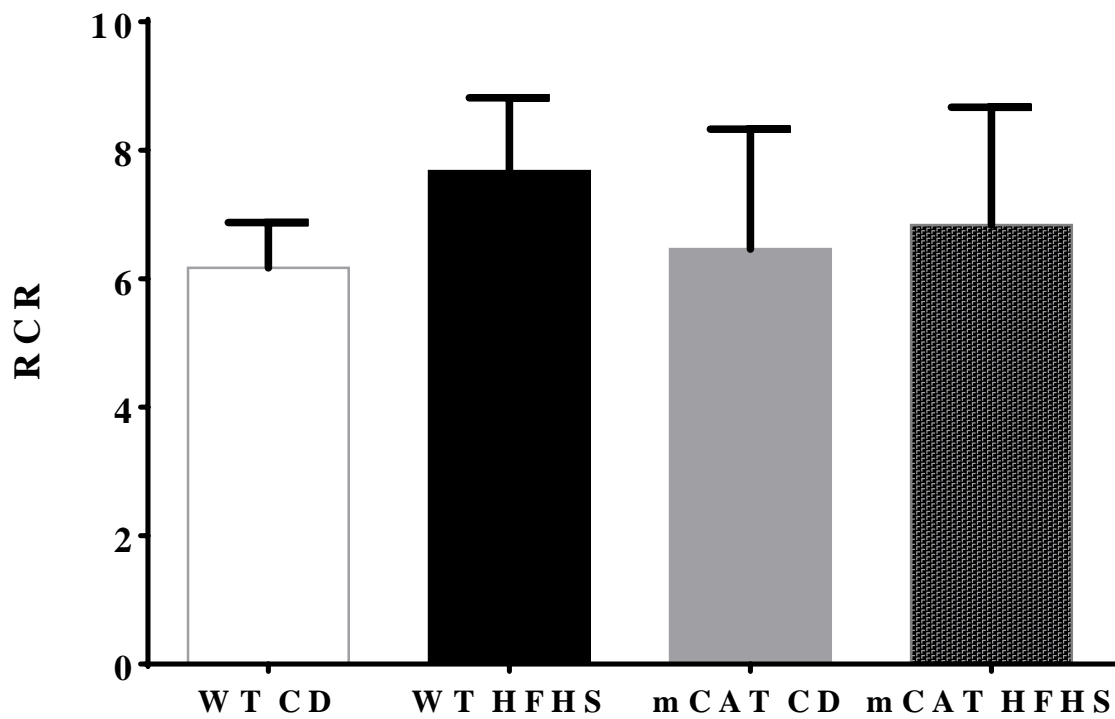

**Figure S3. Exposure to the reducing agent dithiothreitol (DTT, 5 mM) *ex vivo* corrects ATP synthesis for complex II, but not complex I, substrates. Panel A.** Complex I substrate-driven ATP synthesis rate (5 mM pyruvate + 5mM malate); **Panel B.** Complex II substrate-driven ATP synthesis rate (5 mM succinate + 2μM rotenone). Values are mean ± SEM; n=4-5; # P<0.05 vs WT HFHS.

A.

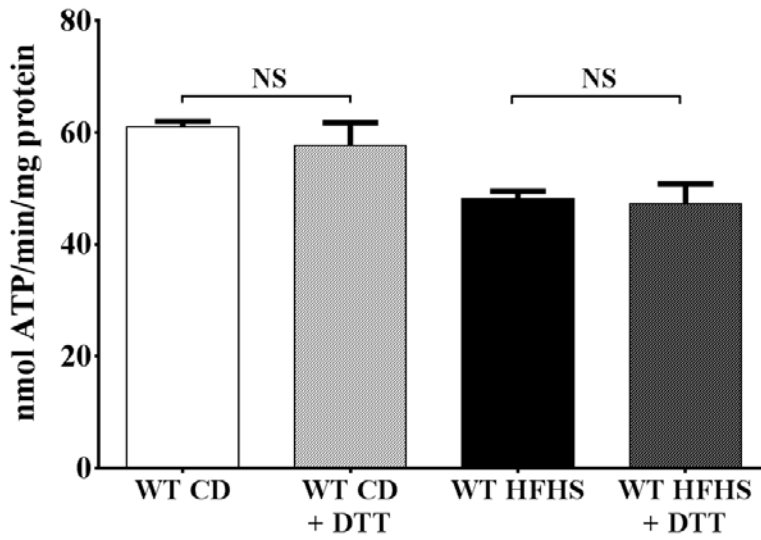

B.

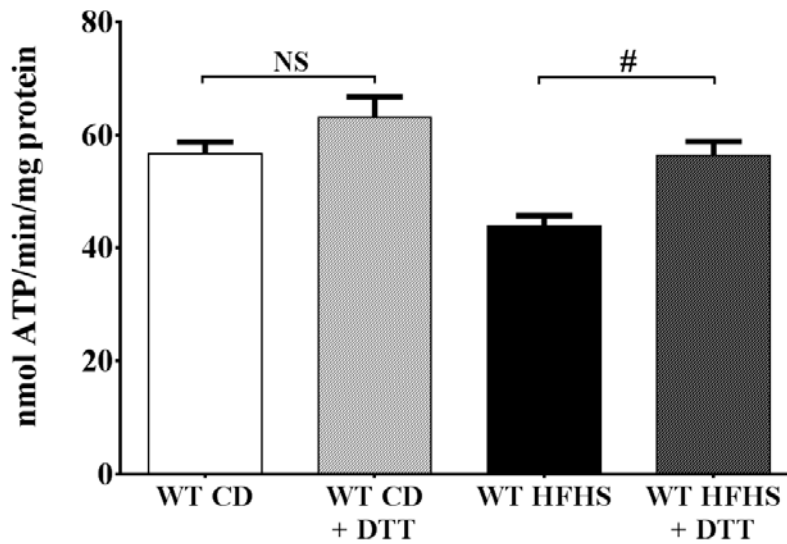

**Figure S4. Neither complex I nor Complex II substrate-driven ATP synthesis rates in cardiac mitochondria from mCAT mice fed a HFHS are effected *ex-vivo* by DTT (5 mM). A) Complex I substrate-driven ATP synthesis rate (5 mM pyruvate + 5mM malate); B) Complex II substrate-driven ATP synthesis rate (5 mM succinate + 2 $\mu$ M rotenone).**

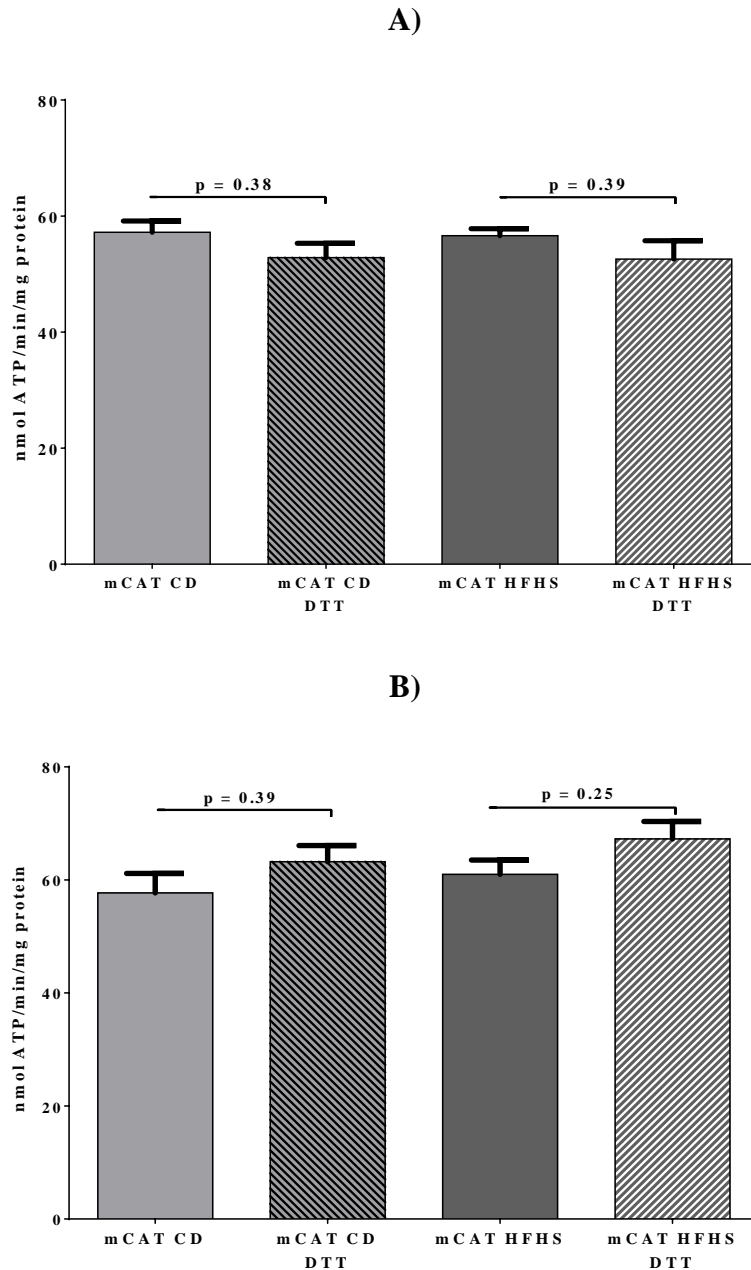

Supplement: JAH3-5-e002555-s001.pdf [file JAH3-5-e002555-s001.pdf]
